# Supplementary material for: Heme oxygenase‐1 deficiency triggers exhaustion of hematopoietic stem cells
Source: PubMed Central journal article supplement (PMC7001511; doi:10.15252/embr.201947895), 2019-12-29
Supplement: EMBR-21-e47895-s001.pdf [file EMBR-21-e47895-s001.pdf]

Appendix content:

**Appendix Figure S1** Related to Figure 1  
**Appendix Figure S2** Related to Figure 5  
**Appendix Figure S3** Related to Figure 7

page 2  
page 3  
page 4

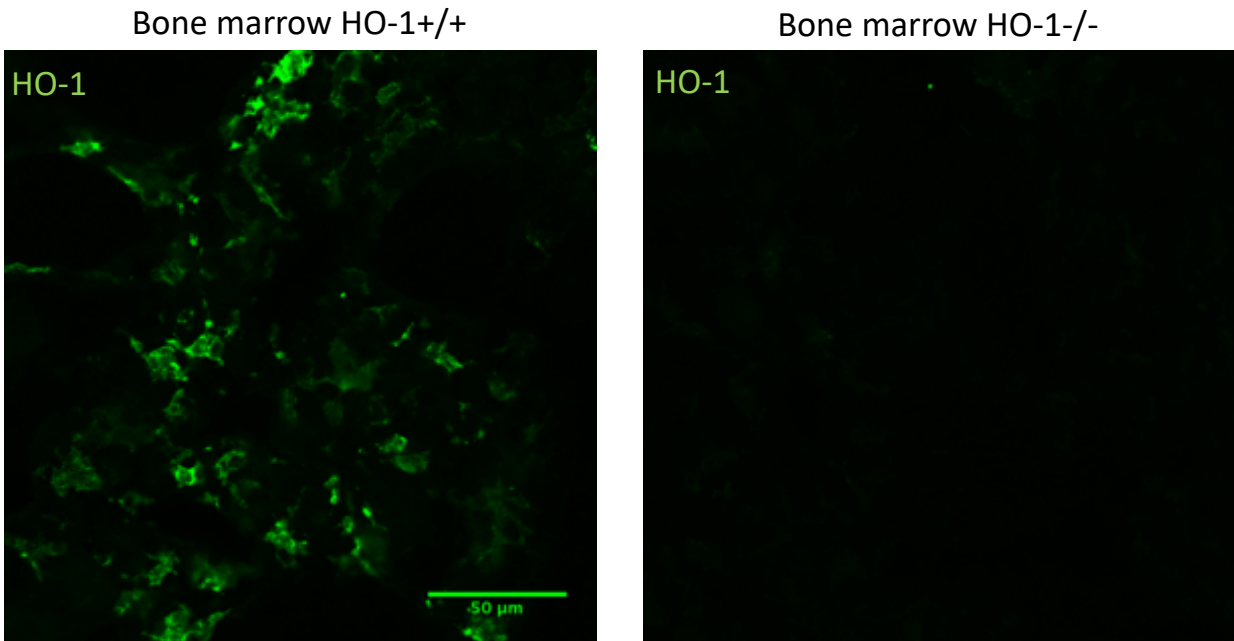

**Appendix Figure S1** Related to Figure 1. Lack of staining with HO-1 antibody (clone SPA894) on bone marrow sections from HO-1<sup>-/-</sup> mice proves antibody specificity.

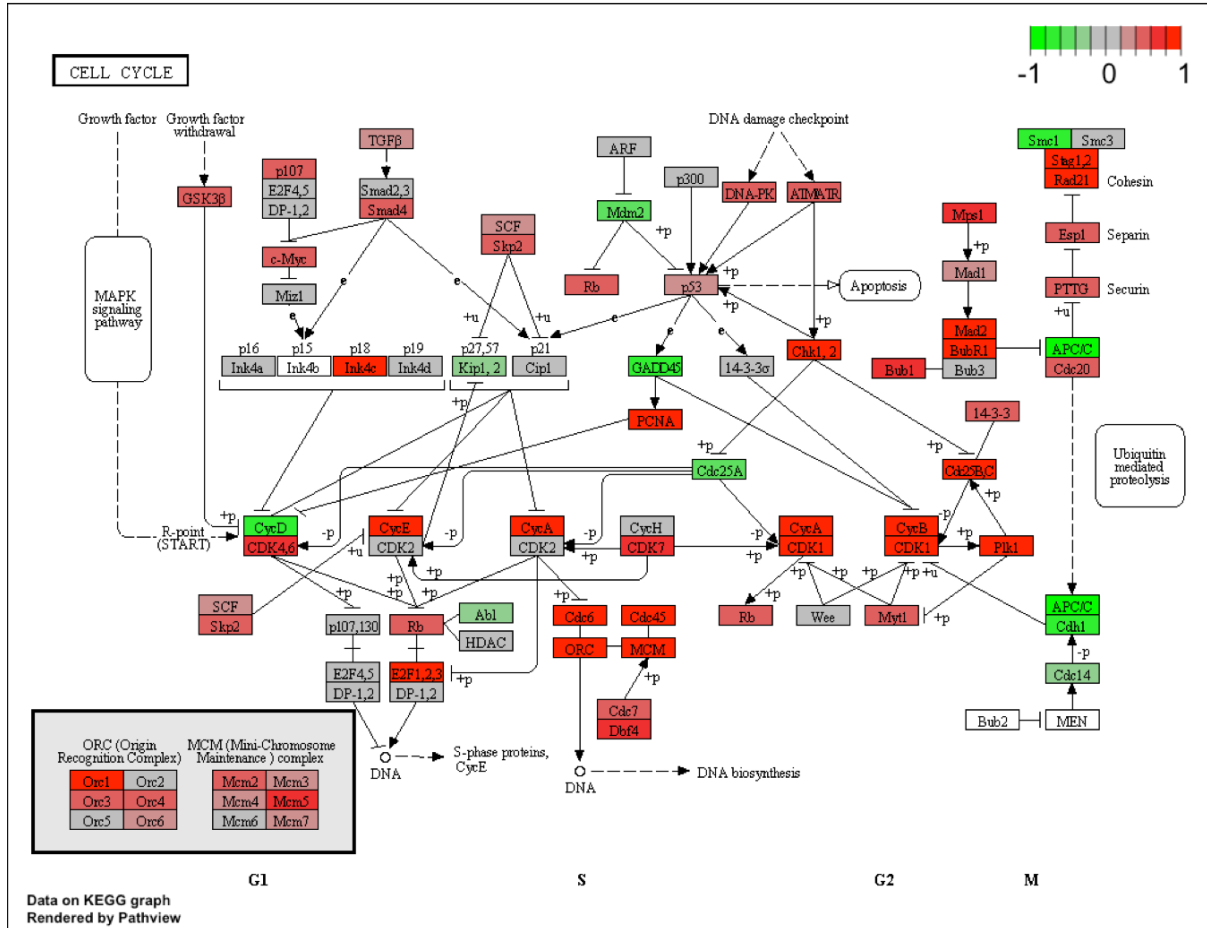

**Appendix Figure S2** Related to Figure 5. KEGG pathway analysis showing the alterations among genes linked with cell cycle in young HO-1<sup>-/-</sup> LT-HSCs.

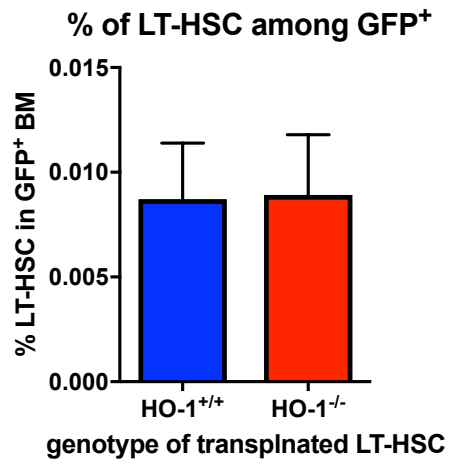

**Appendix Figure S3** Related to Figure 7. Percentage of LT-HSC among all GFP<sup>+</sup> donor derived BM cells in primary recipients, n = 7-8 mice/group.
