# Supplementary material for: Heme oxygenase‐1 deficiency triggers exhaustion of hematopoietic stem cells
Source: PubMed Central journal article supplement (PMC7001511; doi:10.15252/embr.201947895), 2019-12-29
Supplement: EMBR-21-e47895-s002.pdf [file EMBR-21-e47895-s002.pdf]

## Expanded View Figures

**Figure EV1. Expression of HO-1 in BM niche (related to Fig 1).**

- A HO-1 is expressed by CD31<sup>+</sup>endomucin<sup>+</sup> endothelial cells in metaphysis region of a tibia, scale bar 200  $\mu$ m.
- B HO-1 is expressed in sinusoids in diaphysis region, however, at lower levels, scale bar 100  $\mu$ m.
- C PDGFR $\beta$ <sup>+</sup> stromal cells in diaphysis region of the bone express HO-1, scale bar 20  $\mu$ m.
- D Pericytes express HO-1. Part of the HO-1<sup>+</sup> pericytes express Sca-1 (#), while others express no or low levels of Sca-1 (\*), scale bar 20  $\mu$ m.
- E HO-1 is expressed by PDGFR $\beta$ <sup>+</sup> stromal cells. Part of HO-1<sup>+</sup>PDGFR $\beta$ <sup>+</sup> cells produce SDF-1 $\alpha$ , scale bar 20  $\mu$ m.

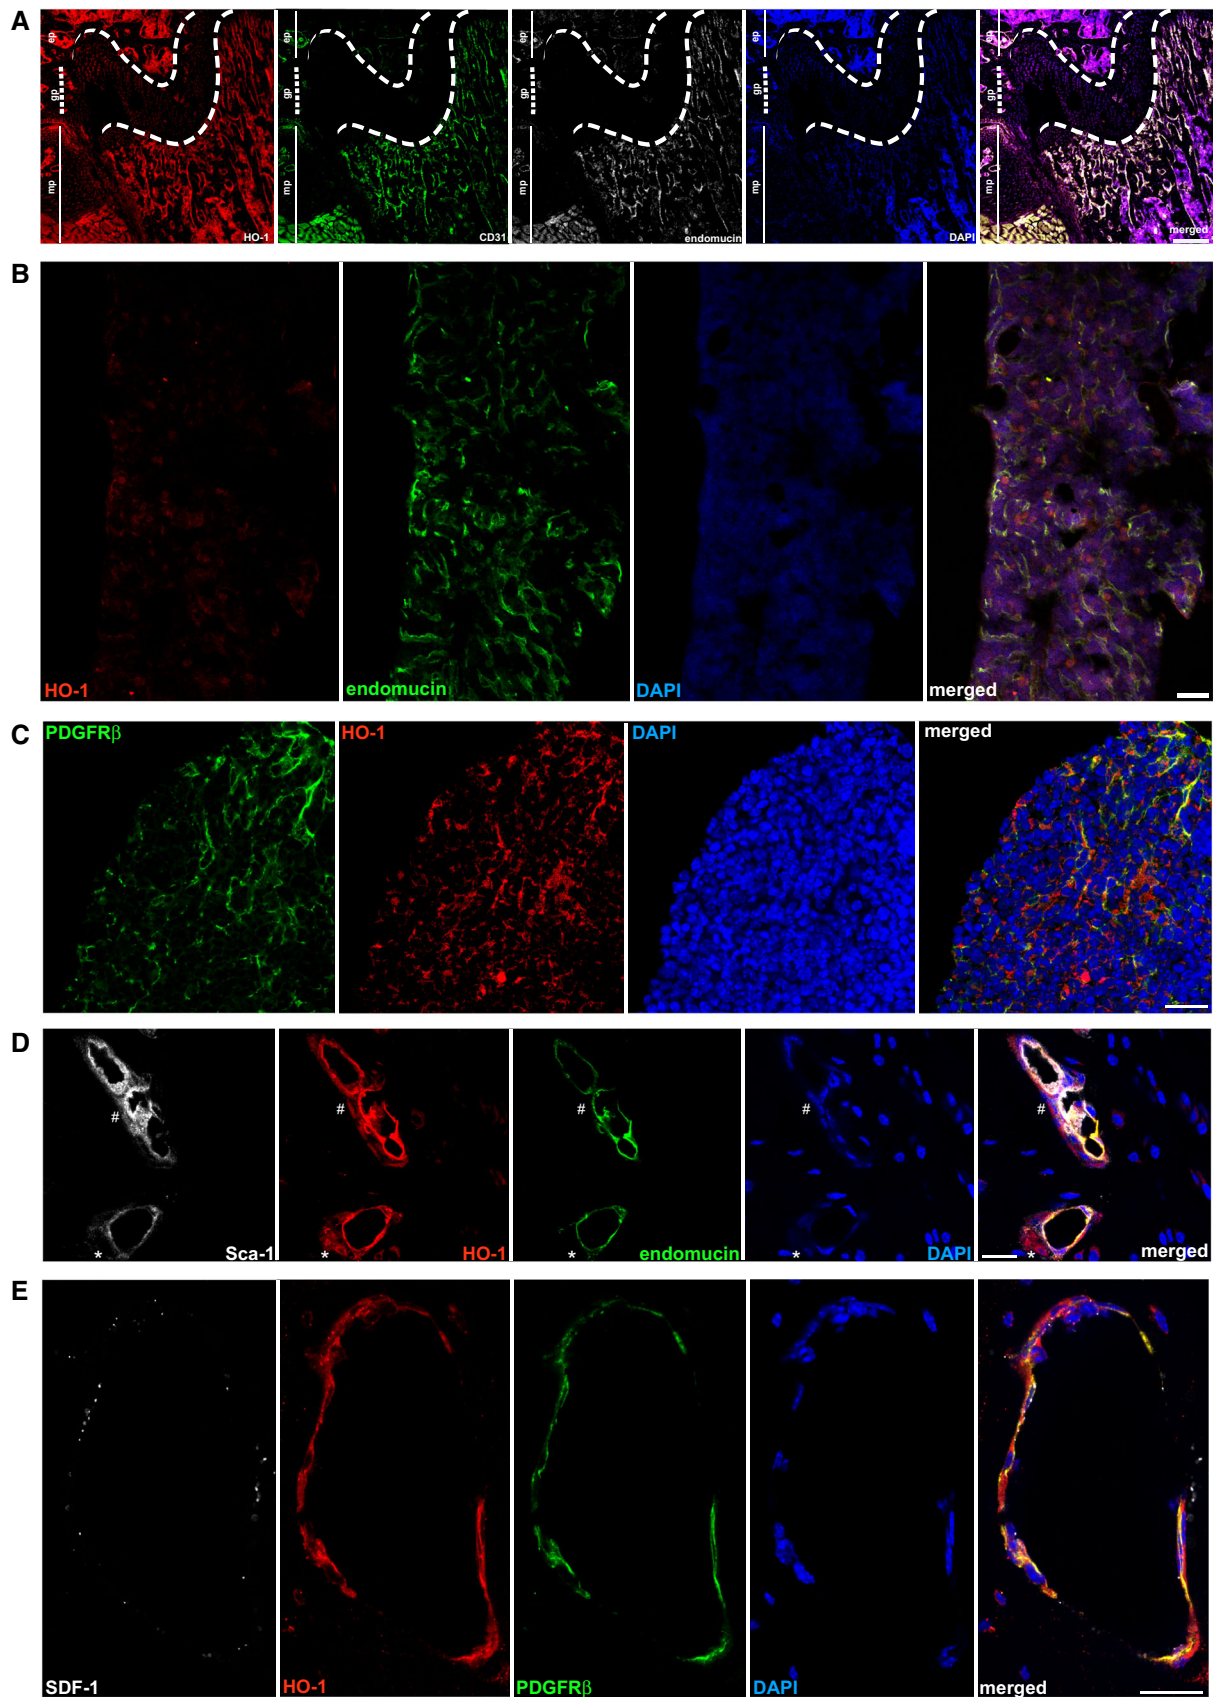

Figure EV1.

**Figure EV2. Frequency of hematopoietic stem and progenitors cells in HO-1<sup>+/+</sup> and HO-1<sup>-/-</sup> mice (related to Fig 4).**

- A Frequency of ST-HSC II population in young HO-1<sup>+/+</sup> and HO-1<sup>-/-</sup> mice. Two-tailed unpaired *t*-test.
- B Frequency of MEP, EP, and GMP populations in young HO-1<sup>+/+</sup> and HO-1<sup>-/-</sup> mice. Two-tailed unpaired *t*-test.
- C Frequency and total number of LT-HSCs, ST-HSCs, and MPPs in 12-month-old mice, *n* = 5 mice/group. Unpaired, two-tailed *t*-test.

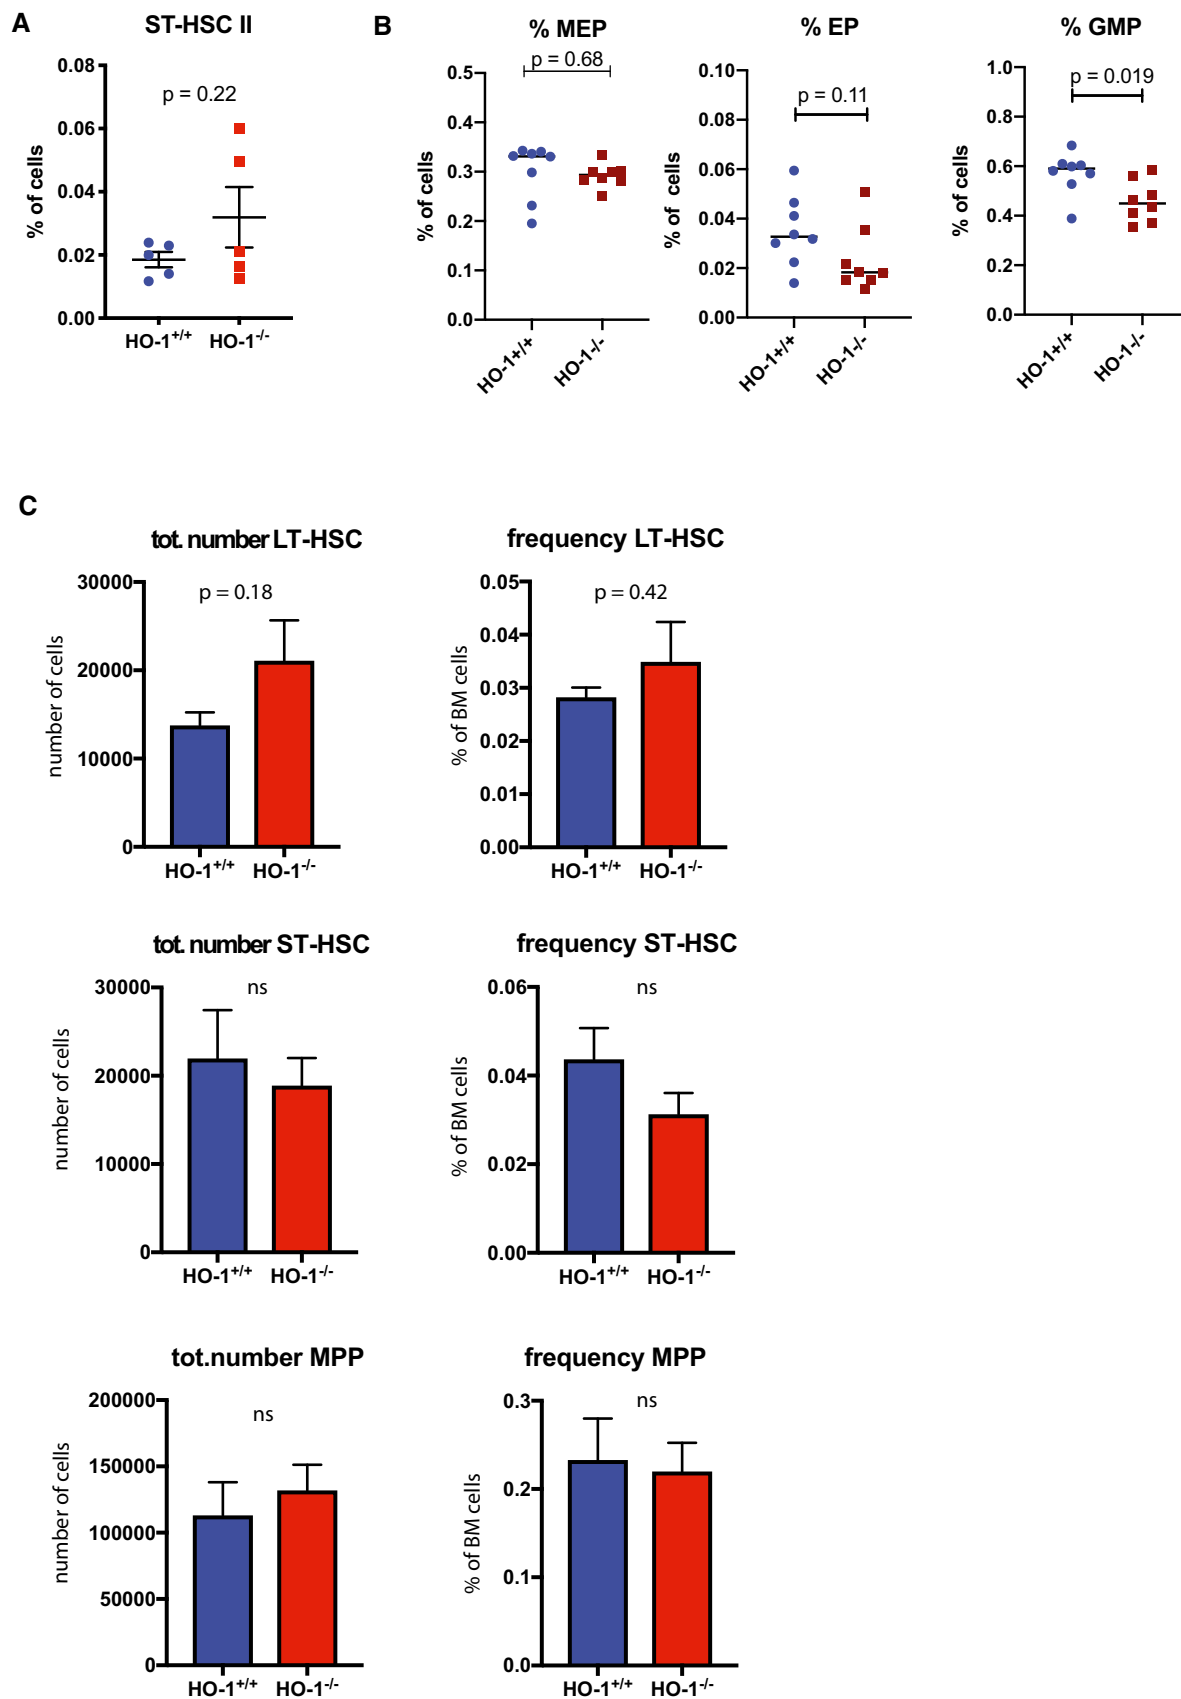

Figure EV2.

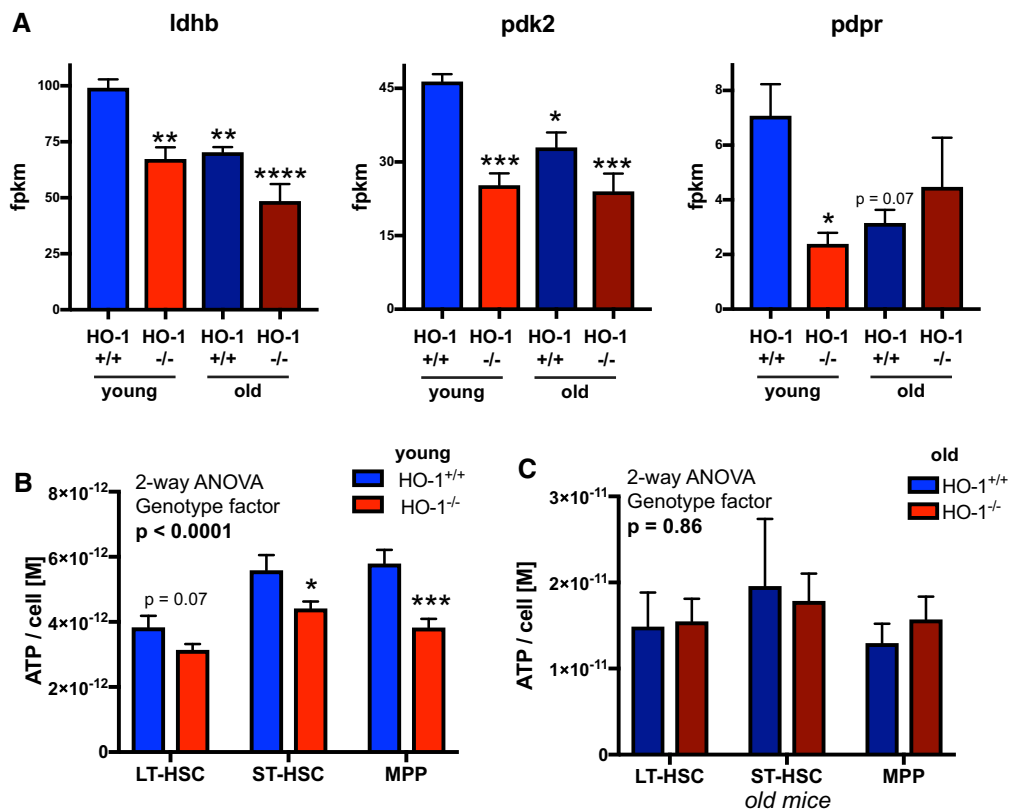

**Figure EV3. Decreased expression of genes regulating pyruvate metabolism in young HO-1<sup>-/-</sup> LT-HSCs and old LT-HSCs is associated with lower ATP levels.**

**A** Ldhb, Pdk2, and Pdpr are downregulated in young HO-1<sup>-/-</sup> LT-HSCs, but not in old HO-1<sup>-/-</sup> LT-HSCs. Analyzed by RNA-seq. Data are shown as mean ± SEM, four mice/group, \* $P < 0.05$ , \*\* $P < 0.01$ , \*\*\* $P < 0.001$ , \*\*\*\* $P < 0.0001$  comparing to young HO-1<sup>+/+</sup> group, two-tailed unpaired  $t$ -test.

**B, C** ATP levels are (B) lower in young HO-1<sup>-/-</sup> LT-HSCs comparing to young HO-1<sup>+/+</sup> LT-HSCs, (C) but not in old HO-1<sup>-/-</sup> LT-HSCs comparing to old HO-1<sup>+/+</sup> LT-HSCs. ATP levels measured in two independent experiments. Data are shown as mean ± SEM,  $n = 8-18$ /group. \* $P < 0.05$ , \*\*\* $P < 0.001$ , two-tailed unpaired  $t$ -test.

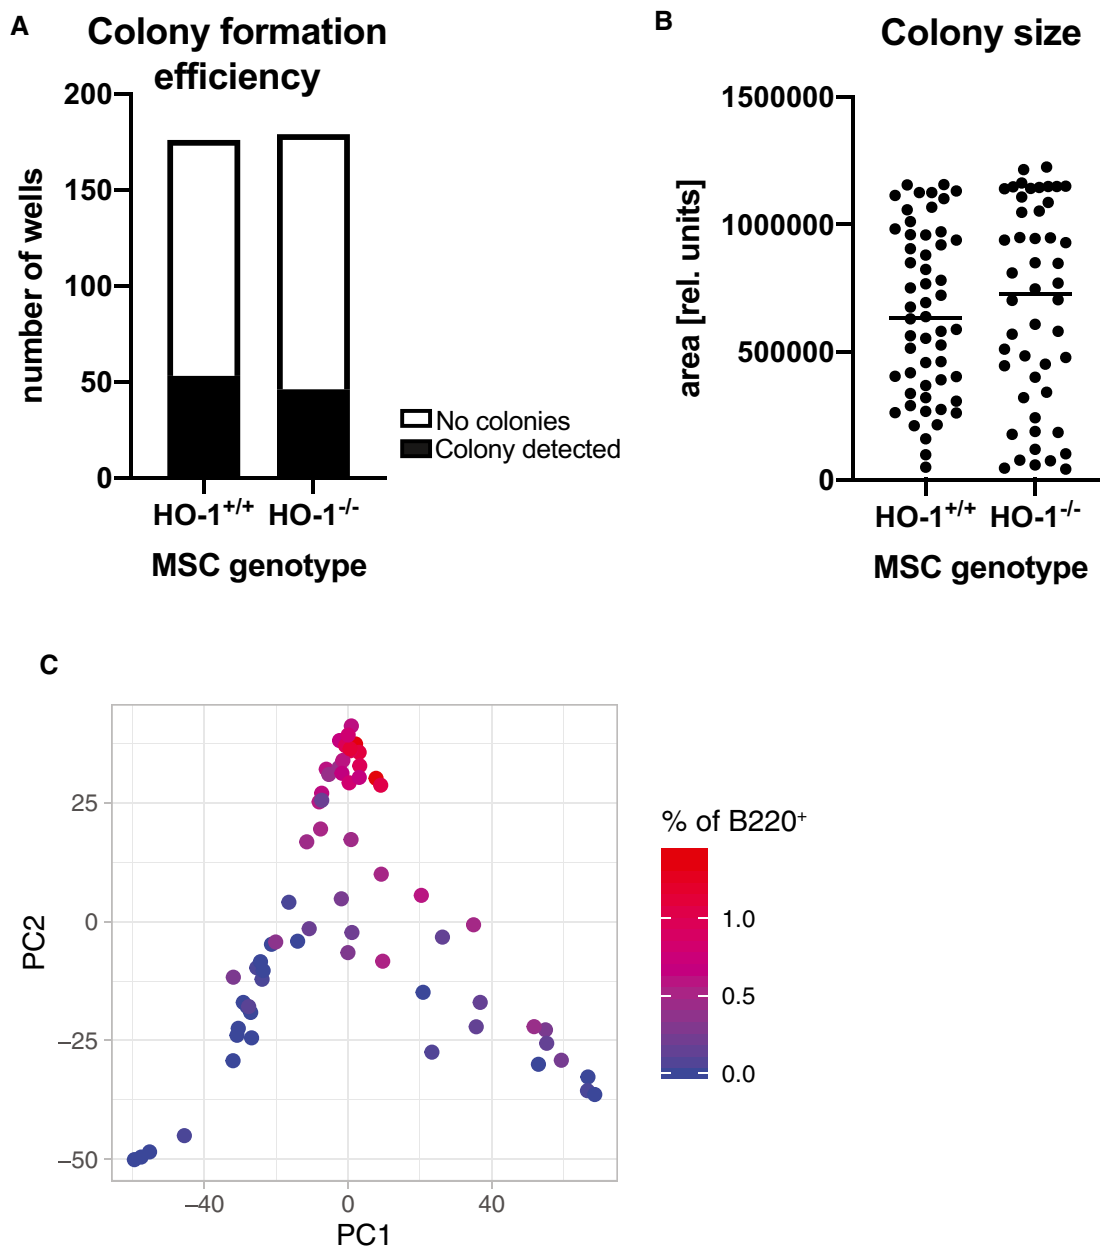

**Figure EV4. Characteristic of colonies formed by HSCs co-cultured with HO-1<sup>-/-</sup> or HO-1<sup>+/+</sup> MSCs.**

A, B (A) Colony formation efficiency and (B) the size of the formed colonies did not differ between groups.

C Frequency of B220<sup>+</sup> cells among analyzed colonies. 46–56 analyzed colonies/group.

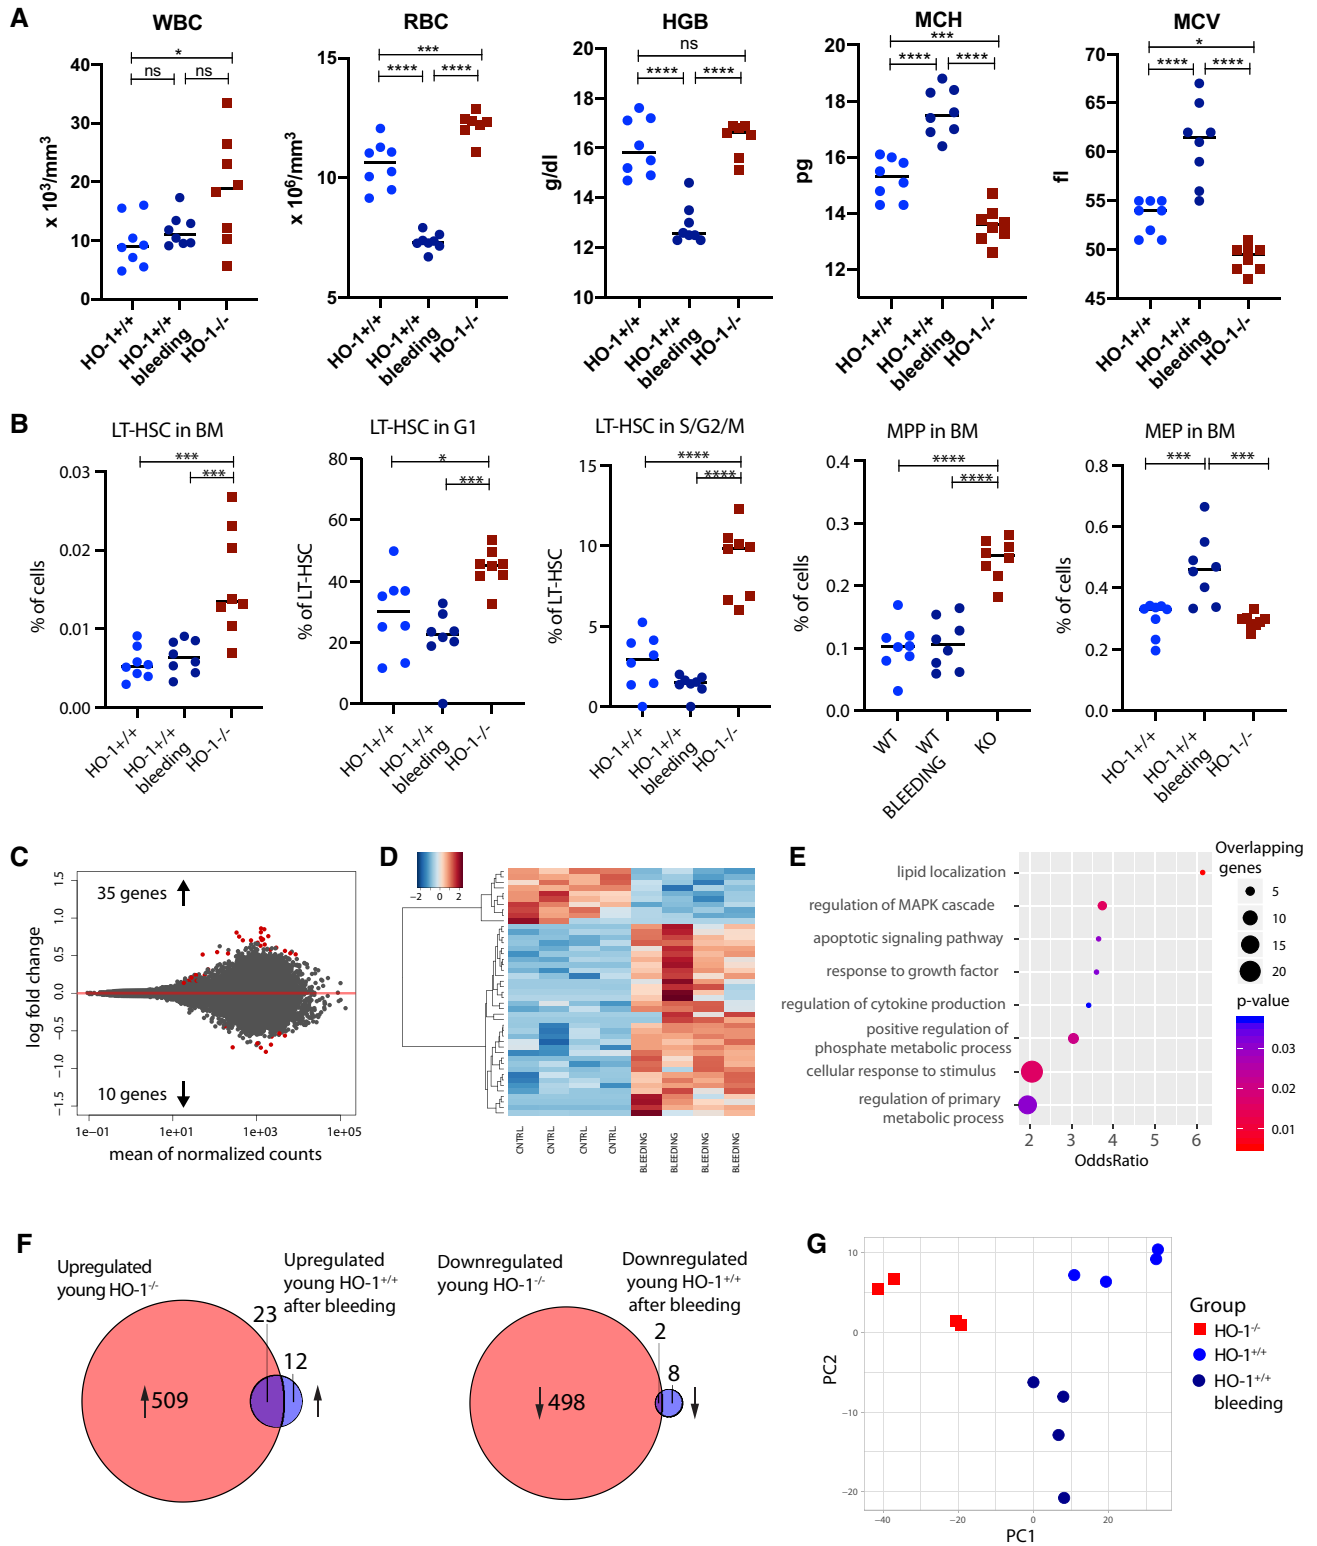

Figure EV5.

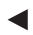**Figure EV5. Induction of anemia by serial bleeding does not induce LT-HSC phenotype observed in HO-1<sup>-/-</sup> mice.**

- A Comparison of selected blood morphology parameters of HO-1<sup>-/-</sup> mice with HO-1<sup>+/+</sup> that were bled. \**P* < 0.05, \*\*\**P* < 0.001, \*\*\*\**P* < 0.0001, two-tailed unpaired *t*-test.
- B Comparison of frequency and cell cycle of LT-HSCs and frequency of MPPs and MPPs from bled HO-1<sup>+/+</sup> mice with LT-HSCs from HO-1<sup>-/-</sup> mice. \**P* < 0.05, \*\*\**P* < 0.001, \*\*\*\**P* < 0.0001, two-tailed unpaired *t*-test.
- C, D RNA-seq analysis revealed 45 differentially regulated genes in LT-HSCs from bled HO-1<sup>+/+</sup> mice vs. LT-HSCs from control HO-1<sup>+/+</sup> mice. Color key represents gene expression (as z-score among row).
- E GSEA among GOBP annotations based on differentially regulated genes.
- F Comparison of overlapping genes that were differentially expressed in LT-HSCs from young HO-1<sup>-/-</sup> mice with genes that were differentially expressed in LT-HSCs from bled HO-1<sup>+/+</sup> mice.
- G PCA based on genes differentially expressed in LT-HSCs from both young HO-1<sup>-/-</sup> and bled HO-1<sup>+/+</sup> mice.
